# Supplementary material for: Measuring Decentering and Related Constructs: Capacity and Limitations of Extant Assessment Scales
Source: Springer Nature journal article supplement (doi:10.1007/s12671-017-0743-9), 2017-06-01
Supplement: MOESM2 [file 12331218]

**Tables in Supplemental Materials**

Table 1

*Exploratory Factor Analysis Item-Loadings and Extraction Communalities for the Two-Factor Solution*

| **Items** | **Factor I**  **Intentional Decentered Perspective** | **Factor II**  **Automatic Reactivity to Thought Content** | **Communality** |
| --- | --- | --- | --- |
| **DDS1.** To what extent would you normally be able to defuse from … Feelings of Anger. You become angry when someone takes your place in a long line. | **.49** | .13 | .25 |
| DDS2. To what extent would you normally be able to defuse from…. Cravings for Food.You see your favorite food and have the urge to eat it. To what extent would you normally be able to *defuse* from cravings for food*?”* | .39 | .13 | .16 |
| **DDS3.** To what extent would you normally be able to defuse from…. Physical Pain. Imagine that you bang your knee on a table leg. | **.44** | .21 | .22 |
| **DDS4.** To what extent would you normally be able to defuse from…. Anxious Thoughts. Things have not been going well at school or at your job, and work just keeps piling up. | **.61** | -.15 | .41 |
| **DDS5.** To what extent would you normally be able to defuse from…. Thoughts of Self. Imagine you are having a thought such as “no one likes me”. | **.61** | -.08 | .38 |
| **DDS6.** To what extent would you normally be able to defuse from…. Thoughts of Hopelessness. You are feeling sad and stuck in a difficult situation that has no obvious end in sight. | **.67** | -.08 | .47 |
| **DDS7.** To what extent would you normally be able to defuse from…. Thought about motivation or ability. Imagine you are having a thought such as “I can’t do this” or “I just can’t get started.” | **.67** | -.03 | .45 |
| **DDS8.** To what extent would you normally be able to defuse from…. Thoughts about Your Future. Imagine you are having thoughts like, “I’ll never make it” or “I have no future.” | **.64** | -.02 | .41 |
| **DDS9.** To what extent would you normally be able to defuse from…. Sensations of Fear. You are about to give a presentation to a large group. As you sit waiting your turn, you start to notice your heart racing, butterflies in your stomach, and your hands trembling. | **.64** | .07 | .41 |
| **DDS10.** To what extent would you normally be able to defuse from…. Feelings of Sadness. Imagine that you lose out on something you really wanted. | **.65** | -.02 | .42 |
| TMS1. I experienced myself as separate from my changing thoughts and feelings. | .34 | .20 | .14 |
| **TMS2.** I was more concerned with being open to my experiences than controlling or changing them. | **.47** | -.01 | .22 |
| TMS4. I experienced my thoughts more as events in my mind than as necessarily accurate reflection of the way things 'really' are. | .36 | .13 | .14 |
| **TMS7.** I was receptive to observing unpleasant thoughts and feelings without interfering with them. | **.45** | -.02 | .20 |
| TMS8. I was more invested in *just* watching my experiences as they arose, than in figuring out what they could mean. | .34 | .02 | .12 |
| **TMS9.** I approached each experience by trying to accept it, no matter whether it was pleasant or unpleasant. | **.49** | -.08 | .25 |
| TMS11. I was aware of my thought and feelings without overidentifying with them. | .42 | .05 | .18 |
| **EQ6.** I can slow my thinking at times of stress. | **.40** | -.15 | .19 |
| **EQ3.** I am better able to accept myself as I am. | .20 | **-.05** | .35 |
| **EQ9.** I notice that I don’t take difficulties so personally. | .17 | **-.41** | .20 |
| EQ10. I can separate myself from my thoughts and feelings. | .31 | -.28 | .19 |
| EQ12. I can take time to respond to difficulties. | .30 | -.25 | .17 |
| **EQ14.** I can treat myself kindly. | .27 | **-.52** | .37 |
| EQ15. I can observe unpleasant feelings without being drawn into them. | .31 | -.34 | .23 |
| EQ16. I have the sense that I am fully aware of what is going on around me and inside me. | .28 | -.13 | .10 |
| EQ17. I can actually see that I am not my thoughts. | .18 | -.02 | .03 |
| EQ18. I am consciously aware of a sense of my body as a whole. | .26 | -.23 | .14 |
| EQ20. I view things from a wider perspective. | .26 | -.13 | .10 |
| **CFQ1.** My thoughts cause me distress or emotional pain. | .11 | **.80** | .64 |
| **CFQ2.** I get so caught up in my thoughts that I am unable to do the things that I most want to do. | .04 | **.75** | .56 |
| **CFQ3.** I over-analyse situations to the point where it’s unhelpful to me. | .18 | **.76** | .59 |
| **CFQ4.** I struggle with my thoughts. | .10 | **.82** | .67 |
| **CFQ5.** I get upset with myself for having certain thoughts. | .13 | **.72** | .52 |
| **CFQ6.** I tend to get very entangled in my thoughts. | .13 | **.84** | .71 |
| **CFQ7.** It’s such a struggle to let go of upsetting thoughts even when I know that letting go would be helpful. | .10 | **.80** | .60 |
| MAQ1. If something has upset me, I try to put my judgments on hold for a while. | -.15 | -.03 | .02 |
| MAQ2r. When I get low, my feelings show things in their true light. | -.04 | .12 | .02 |
| MAQ3. When I get low, I remind myself that I may be seeing things as more negative than they really are. | -.19 | .09 | .10 |
| MAQ4r. I trust my own way of seeing things when I feel depressed. | -.19 | .01 | .04 |
| MAQ5. If I am feeling low, I know my thoughts and feelings are not necessarily realistic. | -.18 | .03 | .03 |
| MAQ6r. When I am down, I can see things as they really are. | -.04 | .02 | .00 |
| MAQ7. When I am depressed, I am aware that there could be other ways of viewing the situation. | -.26 | .08 | .08 |
| MAQ8r. When I am depressed, I am sure that things really are as bad as they seem. | -.25 | .25 | .14 |
| MAQ9. I can't trust my judgments about myself when I feel down. | -.03 | -.22 | .05 |

Table 2

*Confirmatory Factor Analysis Item-Factor Loadings for the Two-Factor Solution (N=171)*

| **Items** | **Factor I**  **Intentional Decentered Perspective** | **Factor II**  **Automatic Reactivity to Thought Content** |
| --- | --- | --- |
| **DDS1.** To what extent would you normally be able to defuse from…Feelings of Anger. You become angry when someone takes your place in a long line. | **.43** | **-** |
| DDS3. To what extent would you normally be able to defuse from…Physical Pain. Imagine that you bang your knee on a table leg. | .35 | **-** |
| **DDS4.** To what extent would you normally be able to defuse from…Anxious Thoughts. Things have not been going well at school or at your job, and work just keeps piling up. | **.67** | **-** |
| **DDS5.** …Thoughts of Self. Imagine you are having a thought such as “no one likes me”. | **.71** | **-** |
| **DDS6.** To what extent would you normally be able to defuse from…Thoughts of Hopelessness. You are feeling sad and stuck in a difficult situation that has no obvious end in sight. | **.79** | **-** |
| **DDS7.** To what extent would you normally be able to defuse from…Thought about motivation or ability. Imagine you are having a thought such as “I can’t do this” or “I just can’t get started.” | **.78** | **-** |
| **DDS8.** To what extent would you normally be able to defuse from…Thoughts about Your Future. Imagine you are having thoughts like, “I’ll never make it” or “I have no future.” | **.82** | **-** |
| **DDS9.** To what extent would you normally be able to defuse from…Sensations of Fear. You are about to give a presentation to a large group. As you sit waiting your turn, you start to notice your heart racing, butterflies in your stomach, and your hands trembling. | **.61** |  |
| **DDS10.** To what extent would you normally be able to defuse from…Feelings of Sadness. Imagine that you lose out on something you really wanted. | **.49** | **-** |
| TMS2. I was more concerned with being open to my experiences than controlling or changing them. | .28 | **-** |
| TMS7. I was receptive to observing unpleasant thoughts and feelings without interfering with them. | .23 | **-** |
| TMS9. I approached each experience by trying to accept it, no matter whether it was pleasant or unpleasant. | .29 | **-** |
| EQ6. I can slow my thinking at times of stress. | .28 | **-** |
| EQ3. I am better able to accept myself as I am. | **-** | -.27 |
| EQ9. I notice that I don’t take difficulties so personally. | **-** | -.22 |
| EQ14. I can treat myself kindly. | **-** | -.32 |
| **CFQ1.** My thoughts cause me distress or emotional pain. | **-** | **.72** |
| **CFQ2.** I get so caught up in my thoughts that I am unable to do the things that I most want to do. | **-** | **.78** |
| **CFQ3.** I over-analyse situations to the point where it’s unhelpful to me. | **-** | **.79** |
| **CFQ4.** I struggle with my thoughts. | **-** | **.82** |
| **CFQ5.** I get upset with myself for having certain thoughts. | **-** | **.64** |
| **CFQ6.** I tend to get very entangled in my thoughts. | **-** | **.82** |
| **CFQ7.** It’s such a struggle to let go of upsetting thoughts even when I know that letting go would be helpful. | **-** | **.86** |
